# Supplementary material
Source: MDPI journal article supplement (https://www.mdpi.com/1999-4907/15/4/596)
Supplement: s1 [file s1]

# Supplementary Materials

**Table S1.** ANOVA results of different models for Landsat-9 and Sentinel-2.

| Models                       | Variance and Standard Deviation |
|------------------------------|---------------------------------|
| ANN (Landsat-9)              | $0.7787 \pm 0.0673$             |
| ANN (Sentinel-2)             | $0.7668 \pm 0.0773$             |
| RF (Landsat-9)               | $0.7652 \pm 0.0662$             |
| RF (Sentinel-2)              | $0.7891 \pm 0.0459$             |
| SVM (Landsat-9)              | $0.7596 \pm 0.0471$             |
| SVM (Sentinel-2)             | $0.7787 \pm 0.0462$             |
| <b>ANOVA test</b>            |                                 |
| F value = 0.339, $p < 0.887$ |                                 |

**Table S2.** ANOVA for models' accuracy of Sentinel-2 at different resolutions.

| Models                       | Variance and Standard Deviation |
|------------------------------|---------------------------------|
| ANN (10 M-Sentinel-2)        | $0.8419 \pm 0.0222$             |
| ANN (30 M-Sentinel-2)        | $0.7668 \pm 0.0773$             |
| RF (10 M-Sentinel-2)         | $0.8027 \pm 0.0236$             |
| RF (30 M-Sentinel-2)         | $0.7891 \pm 0.0459$             |
| SVM (10 M-Sentinel-2)        | $0.8436 \pm 0.0106$             |
| SVM (30 M-Sentinel-2)        | $0.7787 \pm 0.0462$             |
| <b>ANOVA test</b>            |                                 |
| F value = 5.542, $p < 0.001$ |                                 |

**Table S3.** ANOVA for multi-temporal models' accuracy.

| Models                        | Variance and Standard Deviation |
|-------------------------------|---------------------------------|
| ANN (RGI)                     | $0.8406 \pm 0.0381$             |
| ANN (NDVI)                    | $0.8197 \pm 0.0428$             |
| ANN (NDMI)                    | $0.8397 \pm 0.0512$             |
| ANN (MSI)                     | $0.8437 \pm 0.0303$             |
| RF (RGI)                      | $0.7674 \pm 0.0632$             |
| RF (NDVI)                     | $0.7196 \pm 0.0389$             |
| RF (NDMI)                     | $0.6957 \pm 0.0458$             |
| RF (MSI)                      | $0.7932 \pm 0.0472$             |
| SVM (RGI)                     | $0.8595 \pm 0.0462$             |
| SVM (NDVI)                    | $0.8021 \pm 0.0482$             |
| SVM (NDMI)                    | $0.8404 \pm 0.0417$             |
| SVM (MSI)                     | $0.8533 \pm 0.0434$             |
| <b>ANOVA test</b>             |                                 |
| F value = 13.931, $p < 0.001$ |                                 |

**Table S4.** ANOVA on the accuracy of Landsat single-temporal and multi-temporal models.

| Models                       | Variance and Standard Deviation |
|------------------------------|---------------------------------|
| ANN (RGI difference)         | $0.8406 \pm 0.0381$             |
| ANN (single-temporal)        | $0.7787 \pm 0.0673$             |
| RF (RGI difference)          | $0.7674 \pm 0.0632$             |
| RF (single-temporal)         | $0.7652 \pm 0.0662$             |
| SVM (RGI difference)         | $0.8595 \pm 0.0462$             |
| SVM (single-temporal)        | $0.7596 \pm 0.0471$             |
| <b>ANOVA test</b>            |                                 |
| F value = 6.044, $p < 0.001$ |                                 |

**Table S5.** ANOVA for accuracy of three models.

| Models                             | Variance and Standard Deviation |
|------------------------------------|---------------------------------|
| Single-Temporal and Multi-Temporal | 0.8826 ± 0.0445                 |
| Multi-Temporal                     | 0.8595 ± 0.0462                 |
| Single-Temporal                    | 0.7787 ± 0.0459                 |
| <b>ANOVA test</b>                  |                                 |
| F value = 11.437, $p < 0.001$      |                                 |
